# Supplementary material for: Structural Characterization of Unusual Fatty Acid Methyl Esters with Double and Triple Bonds Using HPLC/APCI-MS2 with Acetonitrile In-Source Derivatization
Source: MDPI journal article supplement (doi:10.3390/molecules26216468), 2021-10-26
Supplement: s1 [file s1]

# Structural Characterization of Unusual Fatty Acid Methyl Esters with Double and Triple Bonds Using HPLC/APCI-MS<sup>2</sup> with Acetonitrile In-Source Derivatization

Petra Horká <sup>1,2</sup>, Vladimír Vrkoslav <sup>1</sup>, Jiří Kindl <sup>1</sup>, Karolina Schwarzová-Pecková <sup>2</sup> and Josef Cvačka <sup>1,2\*</sup>

<sup>1</sup> Institute of Organic Chemistry and Biochemistry of the Czech Academy of Sciences, Flemingovo náměstí 542/2, 166 00 Praha 6, Czech Republic

<sup>2</sup> Charles University, Faculty of Science, Department of Analytical Chemistry, Hlavova 2030/8, 128 43 Prague 2, Czech Republic

\* Correspondence: josef.cvacka@uochb.cas.cz; Tel.: +420 220 183 303

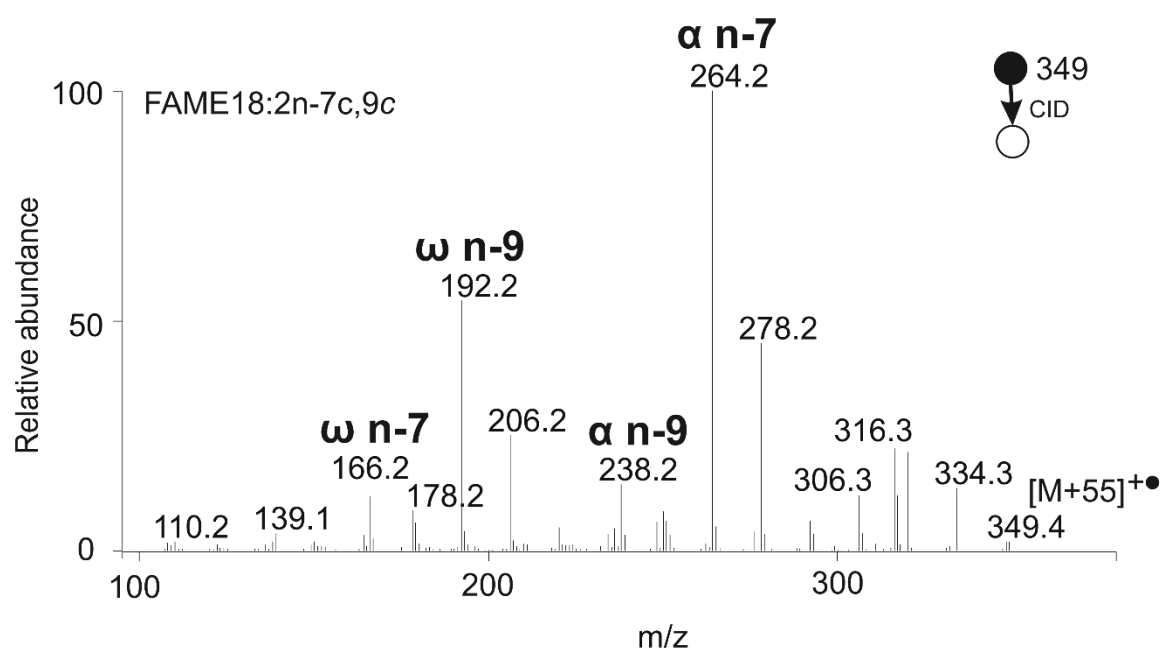

**Figure S1.** APCI MS/MS CID spectrum of the  $[M + 55]^{\bullet+}$  adduct of ricinenic acid methyl ester (FAME 18:2n-7c,9c); MBR =  $264 + 192 - 349 = 107$ .

**Table S1.** High-resolution data for fragments from APCI MS/MS spectra of FAME standards.

| FAME                                          | Fragment                       | Structure                     | Exact mass | Accurate mass | Delta<br>ppm |
|-----------------------------------------------|--------------------------------|-------------------------------|------------|---------------|--------------|
| FAME 18:2n-7 <i>t</i> ,9 <i>t</i>             | $\alpha$ n-7                   | $C_{16}H_{26}NO_2^{+\bullet}$ | 264.1958   | 264.1961      | 1.2          |
|                                               | $\alpha$ n-9                   | $C_{14}H_{24}NO_2^{+\bullet}$ | 238.1802   | 238.1803      | 0.6          |
|                                               | $\omega$ n-7                   | $C_{11}H_{20}N^{+\bullet}$    | 166.1590   | 166.1591      | 0.3          |
|                                               | $\omega$ n-9                   | $C_{13}H_{22}N^{+\bullet}$    | 192.1747   | 192.1748      | 0.7          |
| FAME 18:3n-5 <i>c</i> ,7 <i>t</i> ,9 <i>c</i> | $\alpha$ n-5                   | $C_{18}H_{28}NO_2^{+\bullet}$ | 290.2115   | 290.2113      | -0.5         |
|                                               | $\omega$ n-9                   | $C_{13}H_{20}N^{+\bullet}$    | 190.1591   | 190.1590      | -0.5         |
|                                               | $\alpha$ n-9 *                 | $C_{14}H_{24}NO_2^{+\bullet}$ | 238.1802   | -             | -            |
|                                               | $\omega$ n-5 *                 | $C_9H_{16}N^{+\bullet}$       | 138.1277   | -             | -            |
|                                               | $\alpha$ n-7 *                 | $C_{16}H_{26}NO_2^{+\bullet}$ | 264.1958   | -             | -            |
| FAME 18:1n-9 <sup>TB</sup>                    | $\omega$ n-7 *                 | $C_{11}H_{18}N^{+\bullet}$    | 164.1434   | -             | -            |
|                                               | $\alpha$ n-9 <sup>TB</sup>     | $C_{14}H_{22}NO_2^{+\bullet}$ | 236.1645   | 236.1647      | 0.7          |
|                                               | $\omega$ n-9 <sup>TB</sup>     | $C_{13}H_{22}N^{+\bullet}$    | 192.1746   | 192.1748      | 0.7          |
|                                               | $\alpha$ n-9 <sup>TB</sup> +15 | $C_{15}H_{25}O_2N^{+\bullet}$ | 251.1880   | 251.1882      | 1.0          |
|                                               | $\omega$ n-9 <sup>TB</sup> +15 | $C_{14}H_{25}N^{+\bullet}$    | 207.1982   | 207.1983      | 0.8          |
| FAME 18:2n-6 <sup>TB</sup> ,9 <i>c</i>        | $\omega$ n-6 <sup>TB</sup>     | $C_{10}H_{16}N^{+\bullet}$    | 150.1277   | 150.1278      | 0.4          |
|                                               | $\alpha$ n-6 <sup>TB</sup>     | $C_{17}H_{26}NO_2^{+\bullet}$ | 276.1958   | 276.1961      | 1.1          |
|                                               | $\omega$ n-6 <sup>TB</sup> +15 | $C_{11}H_{19}N^{+\bullet}$    | 165.1512   | 165.1512      | 0.2          |
|                                               | $\alpha$ n-6 <sup>TB</sup> +15 | $C_{18}H_{29}NO_2^{+\bullet}$ | 291.2192   | 291.2196      | 1.0          |
|                                               | $\omega$ n-9                   | $C_{13}H_{20}N^{+\bullet}$    | 190.1590   | 190.1591      | 0.5          |
|                                               | $\alpha$ n-9 *                 | $C_{14}H_{24}NO_2^{+\bullet}$ | 238.1802   | -             | -            |
|                                               |                                |                               |            |               |              |

\* Low intensity signal in the Orbitrap

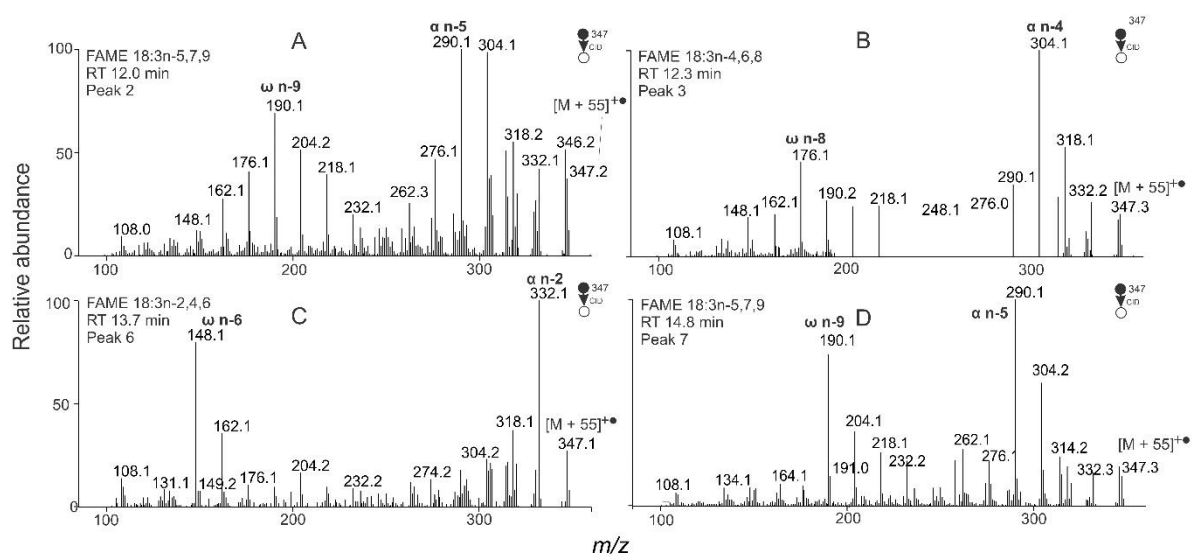

**Figure S2:** APCI MS/MS spectra of the  $[M + 55]^{\bullet\bullet}$  adducts of selected conjugated FAMEs from PSO interpreted as FAME 18:3n-5,7,9 (A), 18:3n-4,6,8 (B), 18:3n-2,4,6 (C), 18:3n-5,7,9 (D).
